# Supplementary material for: Physicochemical and Stability Evaluation of Topical Niosomal Encapsulating Fosinopril/γ-Cyclodextrin Complex for Ocular Delivery
Source: MDPI journal article supplement (doi:10.3390/pharmaceutics14061147), 2022-05-27
Supplement: s1 [file s1]

# Supplementary Materials: Physicochemical and Stability Evaluation of Topical Niosomal Encapsulating Fosinopril/ $\gamma$ -Cyclodextrin Complex for Ocular Delivery

Hay Marn Hnin, Einar Stefánsson, Thorsteinn Loftsson, Rathapon Asasutjarit, Dusadee Charnvanich and Phatsawee Jansook

**Table S1.** pH and zeta potential values of FOS niosomal preparation and FOS/ $\gamma$ CD complex storage at 4 °C, 30  $\pm$  2 °C (75  $\pm$  5% RH) and 40  $\pm$  2 °C (75  $\pm$  5% RH) for 0, 1,3 and 6 months ( $n$  = 3, mean  $\pm$  SD).

| Time (month)                   | Formulation     |                     |                          |                     |                     |                          |
|--------------------------------|-----------------|---------------------|--------------------------|---------------------|---------------------|--------------------------|
|                                | pH              |                     |                          | zeta potential (mV) |                     |                          |
|                                | Sp-DCP          | Sp-DCP+ $\gamma$ CD | FOS/ $\gamma$ CD complex | Sp-DCP              | Sp-DCP+ $\gamma$ CD | FOS/ $\gamma$ CD complex |
| 4 °C                           |                 |                     |                          |                     |                     |                          |
| Initial                        | 6.82 $\pm$ 0.02 | 6.72 $\pm$ 0.02     | 7.41 $\pm$ 0.01          | -35.15 $\pm$ 1.48   | -25.83 $\pm$ 0.87   | -11.13 $\pm$ 0.62        |
| 1 Month                        | 6.76 $\pm$ 0.02 | 6.68 $\pm$ 0.01     | 7.32 $\pm$ 0.02          | -35.14 $\pm$ 1.89   | -25.35 $\pm$ 0.06   | -10.87 $\pm$ 0.46        |
| 3 Months                       | 6.71 $\pm$ 0.04 | 6.63 $\pm$ 0.02     | 7.10 $\pm$ 0.02          | -35.09 $\pm$ 0.09   | -25.22 $\pm$ 1.65   | -10.74 $\pm$ 0.47        |
| 6 Months                       | 6.63 $\pm$ 0.02 | 6.52 $\pm$ 0.04     | 6.78 $\pm$ 0.05          | -34.92 $\pm$ 2.15   | -25.12 $\pm$ 1.65   | -10.45 $\pm$ 0.47        |
| 30 $\pm$ 2 °C (75 $\pm$ 5% RH) |                 |                     |                          |                     |                     |                          |
| Initial                        | 6.82 $\pm$ 0.02 | 6.72 $\pm$ 0.02     | 7.41 $\pm$ 0.01          | -35.15 $\pm$ 1.48   | -25.83 $\pm$ 0.87   | -11.13 $\pm$ 0.62        |
| 1 Month                        | 6.57 $\pm$ 0.03 | 6.53 $\pm$ 0.03     | 5.60 $\pm$ 0.02          | -35.10 $\pm$ 1.75   | -25.23 $\pm$ 0.89   | -10.97 $\pm$ 0.66        |
| 3 Months                       | 6.32 $\pm$ 0.11 | 5.53 $\pm$ 0.03     | 5.34 $\pm$ 0.06          | -35.07 $\pm$ 1.11   | -25.17 $\pm$ 1.34   | -10.73 $\pm$ 0.14        |
| 6 Months                       | 4.39 $\pm$ 0.03 | 4.58 $\pm$ 0.03     | 4.70 $\pm$ 0.01          | -32.63 $\pm$ 1.19   | -21.53 $\pm$ 0.88   | -9.53 $\pm$ 0.14         |
| 40 $\pm$ 2 °C (75 $\pm$ 5% RH) |                 |                     |                          |                     |                     |                          |
| Initial                        | 6.82 $\pm$ 0.02 | 6.72 $\pm$ 0.02     | 7.41 $\pm$ 0.01          | -35.15 $\pm$ 1.48   | -25.83 $\pm$ 0.87   | -11.13 $\pm$ 0.62        |
| 1 Month                        | 5.88 $\pm$ 0.04 | 5.56 $\pm$ 0.03     | 5.11 $\pm$ 0.04          | -27.77 $\pm$ 0.85   | -23.80 $\pm$ 1.56   | -9.50 $\pm$ 0.56         |
| 3 Months                       | 4.42 $\pm$ 0.09 | 4.64 $\pm$ 0.01     | 4.89 $\pm$ 0.01          | -25.97 $\pm$ 1.30   | -22.45 $\pm$ 0.52   | -8.35 $\pm$ 0.50         |
| 6 Months                       | 4.23 $\pm$ 0.10 | 4.39 $\pm$ 0.04     | 4.49 $\pm$ 0.04          | -23.87 $\pm$ 1.89   | -19.95 $\pm$ 0.71   | -8.02 $\pm$ 0.86         |

**Table S2.** Average particle size and size distribution (PDI) of FOS niosomal preparation and FOS/ $\gamma$ CD complex storage at 4 °C, 30  $\pm$  2 °C (75  $\pm$  5% RH) and 40  $\pm$  2 °C (75  $\pm$  5% RH) for 0, 1,3 and 6 months ( $n$  = 3, mean  $\pm$  SD).

| Time (month)                   | Formulation                |                      |                          |                         |                     |                          |
|--------------------------------|----------------------------|----------------------|--------------------------|-------------------------|---------------------|--------------------------|
|                                | Average particle size (nm) |                      |                          | Size distribution (PDI) |                     |                          |
|                                | Sp-DCP                     | Sp-DCP+ $\gamma$ CD  | FOS/ $\gamma$ CD complex | Sp-DCP                  | Sp-DCP+ $\gamma$ CD | FOS/ $\gamma$ CD complex |
| 4°C                            |                            |                      |                          |                         |                     |                          |
| Initial                        | 275.10 $\pm$ 48.20         | 241.70 $\pm$ 34.40   | 243.60 $\pm$ 45.60       | 0.44 $\pm$ 0.02         | 0.18 $\pm$ 0.01     | 0.51 $\pm$ 0.01          |
| 1 Month                        | 281.20 $\pm$ 7.40          | 258.03 $\pm$ 8.80    | 282.00 $\pm$ 26.20       | 0.44 $\pm$ 0.01         | 0.24 $\pm$ 0.03     | 0.51 $\pm$ 0.07          |
| 3 Months                       | 306.80 $\pm$ 8.85          | 266.45 $\pm$ 22.86   | 768.35 $\pm$ 134.22      | 0.55 $\pm$ 0.07         | 0.42 $\pm$ 0.05     | 0.53 $\pm$ 0.06          |
| 6 Months                       | 435.67 $\pm$ 19.48         | 421.47 $\pm$ 10.34   | 2330.75 $\pm$ 296.58     | 0.64 $\pm$ 0.03         | 0.59 $\pm$ 0.02     | 0.55 $\pm$ 0.01          |
| 30 $\pm$ 2 °C (75 $\pm$ 5% RH) |                            |                      |                          |                         |                     |                          |
| Initial                        | 275.10 $\pm$ 48.20         | 241.70 $\pm$ 34.40   | 243.60 $\pm$ 45.60       | 0.44 $\pm$ 0.02         | 0.18 $\pm$ 0.01     | 0.51 $\pm$ 0.01          |
| 1 Month                        | 293.30 $\pm$ 27.10         | 254.70 $\pm$ 10.10   | 1019.40 $\pm$ 179.3      | 0.45 $\pm$ 0.10         | 0.29 $\pm$ 0.10     | 0.59 $\pm$ 0.01          |
| 3 Months                       | 391.40 $\pm$ 7.69          | 309.57 $\pm$ 13.63   | 1023.20 $\pm$ 65.15      | 0.52 $\pm$ 0.02         | 0.53 $\pm$ 0.07     | 0.75 $\pm$ 0.05          |
| 6 Months                       | 911.85 $\pm$ 43.73         | 452.27 $\pm$ 26.40   | 3244.75 $\pm$ 216.10     | 0.71 $\pm$ 0.08         | 0.74 $\pm$ 0.10     | 0.78 $\pm$ 0.16          |
| 40 $\pm$ 2 °C (75 $\pm$ 5% RH) |                            |                      |                          |                         |                     |                          |
| Initial                        | 275.10 $\pm$ 48.20         | 241.70 $\pm$ 34.40   | 243.60 $\pm$ 45.60       | 0.44 $\pm$ 0.02         | 0.18 $\pm$ 0.01     | 0.51 $\pm$ 0.01          |
| 1 Month                        | 296.20 $\pm$ 7.40          | 277.80 $\pm$ 10.40   | 1607.20 $\pm$ 285.10     | 0.48 $\pm$ 0.10         | 0.33 $\pm$ 0.10     | 0.79 $\pm$ 0.10          |
| 3 Months                       | 380.80 $\pm$ 14.07         | 360.10 $\pm$ 47.86   | 1846.70 $\pm$ 91.79      | 0.73 $\pm$ 0.01         | 0.53 $\pm$ 0.09     | 0.88 $\pm$ 0.08          |
| 6 Months                       | 1895.00 $\pm$ 511.53       | 1071.10 $\pm$ 140.27 | 3942.70 $\pm$ 420.90     | 1.00 $\pm$ 0.00         | 0.95 $\pm$ 0.05     | 0.97 $\pm$ 0.24          |
